# Supplementary material for: 5-aminoimidazole-4-carboxamide Riboside Induces Apoptosis Through AMP-activated Protein Kinase-independent and NADPH Oxidase-dependent Pathways
Source: PubMed Central journal article supplement — Immune Netw. 2014 Oct 22;14(5):241–8. doi: 10.4110/in.2014.14.5.241 (PMC4212085; doi:10.4110/in.2014.14.5.241), 2014-10-22
Supplement: in-14-241-s001.pdf [file in-14-241-s001.pdf]

Supplementary information (SI)

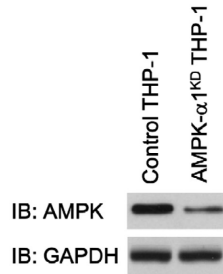

*Wi et al., supplementary information (SI) Figure 1 (Fig. S1)*

**Figure S1.** Generation of AMPK- $\alpha$ 1 knockdown THP-1 cells. THP-1 cells were infected with lentiviral particles containing shRNA targeted human AMPK- $\alpha$ 1 (sc-29673-V) or control lentiviral particles (sc-108080) according to the manufacturer's protocol. Control THP-1 and AMPK- $\alpha$ 1 knockdown THP-1 (AMPK- $\alpha$ 1<sup>KD</sup> THP-1 cells were cultured in puromycin-containing medium (4  $\mu$ g/ml) for 2 weeks to select stable clones, and maintained in RPMI medium containing 4  $\mu$ g/ml puromycin, 10% FBS, 2 mM L-glutamine, 100 U/ml of penicillin, 100  $\mu$ g/ml streptomycin, and  $5 \times 10^{-5}$  M  $\beta$ -mercaptoethanol. Immunoblot (IB) with antibody to anti-AMPK- $\alpha$ 1 or anti-GAPDH was performed to evaluate the knockdown efficacy.
